# Supplementary material for: Testing behaviour and positivity for SARS-CoV-2 infection: Insights from web-based participatory surveillance
Source: Research Square preprint supplement (doi:10.21203/rs.3.rs-688708/v1), 2021-07-06
Supplement: Supplementary file 1 [file f99d19b09509824cfd7f58af.docx]

**SUPPLEMENTARY MATERIALS**

*Title:* Testing behaviour and positivity for SARS-CoV-2 infection: Insights from web-based participatory surveillance

*Authors:* Scott A. McDonald1, Loes Soetens1, Maarten Schipper1, Ingrid H. M. Friesema1, Cees C. van den Wijngaard1, Anne Teirlinck1, Nienke Neppelenbroek1, Susan van den Hof1, Jacco Wallinga1,2, Albert Jan van Hoek1

1 Centre for Infectious Disease Control, Netherlands National Institute for Public Health and the Environment, Bilthoven, the Netherlands

2 Department of Biomedical Data Sciences, Leiden University Medical Center, Leiden, the Netherlands

**Fig. S1**. Heatmap showing positive predictive value (PPV) per symptom, among subpopulations corresponding to each of the six identified lower test propensity/higher positivity participant factors.


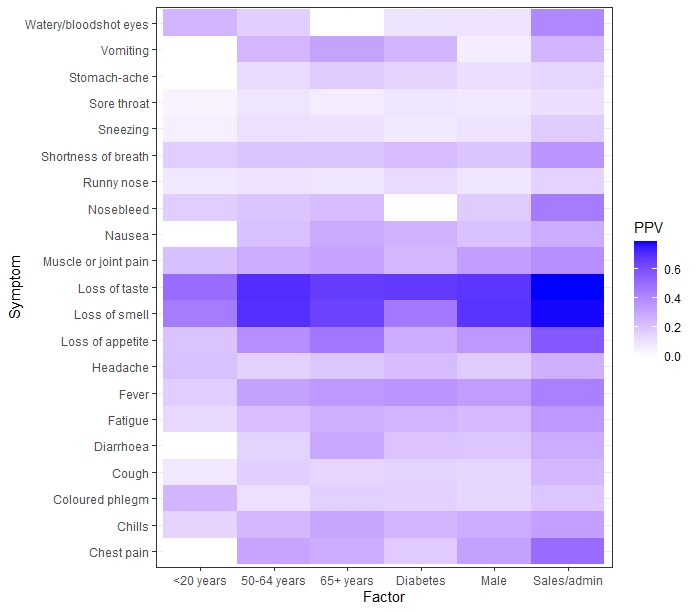


**Fig. S2**. Results of sensitivity analysis restricting to the approximate working age population (20-64 years). Adjusted ORs for test propensity and positivity, for the same participant factors, are shown (analysis period 17 November 2020 to 18 April 2021; *n*=41,017 surveys). Light blue crosses indicate the 95% CIs in each dimension. The shaded quadrant indicates the combination of interest: lower test propensity and higher positivity. *Lung condition* not shown (very low and uncertain OR (0.09, 95% CI: 0–38.9) for positivity).

**
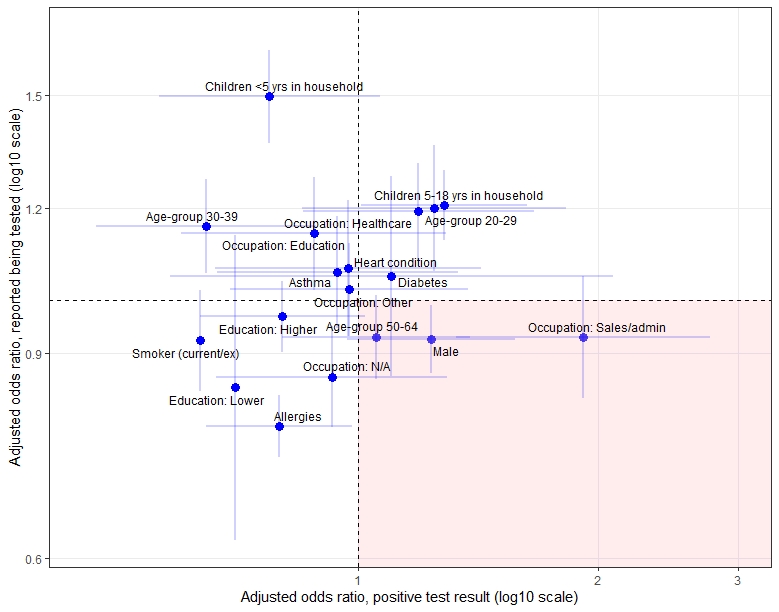
**

**Table S1**. Distribution of sex, age-group and education level, comparing Infectieradar participants (*n*=16,807) to the general population. Data for the year 2020 were obtained from Statistics Netherlands [1,2].

| ***Variable* Group** | **Study population (%)** | **Netherlands population (%)** |
| --- | --- | --- |
| *Age-group*  <20 years  20-29  30-39  40-49  50-64  65+  *Sex*  Male  Female  *Education level (15+ years old)*  None/primary  Middle  Higher | 2.3  7.0  13.1  18.4  38.2  21.0  42.8  57.2  2.3  36.3  61.4 | 21.7  12.8  12.3  12.7  21.0  19.5  49.7  50.3  30.9  36.7  32.4 |

1. Statistics Netherlands. Population; sex, age and martial status. <https://opendata.cbs.nl/statline/#/CBS/en/dataset/7461eng/table?ts=1615898674521>. Accessed 15 March 2021.

2. Statistics Netherlands. Bevolking; onderwijsniveau; geslacht, leeftijd en migratieachtergrond. <https://opendata.cbs.nl/statline/#/CBS/nl/dataset/82275NED/table?ts=1615899135543>. Accessed 15 March 2021.
